# Supplementary material for: Improving Farmer Livelihood Resilience to Climate Change in Rural Areas of Inner Mongolia, China
Source: MDPI journal article supplement (doi:10.3390/agriculture13102030), 2023-10-20
Supplement: s1 [file s1]

# Supporting Information for

## Improving farmer livelihood resilience to climate change in rural areas of Inner Mongolia, China

### Table of Contents

|                                                                                                                                         |    |
|-----------------------------------------------------------------------------------------------------------------------------------------|----|
| Table S1. The scoring system we provided to experts when comparing each pair of dimensions. ....                                        | 2  |
| Table S2. The standard for classification of farmers' livelihood types.....                                                             | 3  |
| Table S3. The definitions of factors influencing the farmers' livelihood resilience.....                                                | 4  |
| Table S4. Experts' insights on the weight of farmers' livelihood resilience dimension....                                               | 5  |
| Table S5. Sociodemographic characteristics of surveyed farmers with valid data. ....                                                    | 6  |
| Table S6. The classification of farmers' livelihoods and the percentage of responders in the farmers survey. ....                       | 7  |
| Table S7. The survey results of farmers' livelihood resilience indicators from all farmers.....                                         | 8  |
| Table S8. The livelihood resilience value of farmers with different livelihood types. ....                                              | 10 |
| Table S9. The scores of livelihood resilience indicators of farmers with different livelihood types. ....                               | 11 |
| Table S10. The livelihood resilience of farmers in different towns.....                                                                 | 13 |
| Table S11. The scores of livelihood resilience indicators of farmers in different towns. ....                                           | 14 |
| Table S12. Factors influencing farmers' livelihood resilience to climate change and survey results from all farmers. ....               | 16 |
| Table S13. Regression analysis results of factors influencing the livelihood resilience of farmers with different livelihood types..... | 17 |
| Table S14. Regression analysis results of factors influencing the livelihood resilience of farmers in different towns. ....             | 19 |

**Table S1. The scoring system we provided to experts when comparing each pair of dimensions.**

| Score | Explanation                          |
|-------|--------------------------------------|
| 1     | A is the same as B.                  |
| 3     | A is slightly important than B.      |
| 5     | A is more strongly important than B. |
| 7     | A is very strongly important than B. |
| 9     | A is extremely important than B.     |

**Table S2. The standard for classification of farmers' livelihood types.**

| Different livelihood type  | Explanation                                                                                                                                                          |
|----------------------------|----------------------------------------------------------------------------------------------------------------------------------------------------------------------|
| Sole agriculture           | The proportion of household agricultural income $\geq$ 90%, agricultural income includes income from farming, forestry, husbandry, and fishery.                      |
| Agriculture as a major job | 50% $\leq$ Proportion of household agricultural income<90%, agricultural income is the main source of income, and business, labor, and wage income are supplemented. |
| Agriculture as a side job  | The proportion of household agricultural income<50%, business, labor, and wage income are the main source of income, and agricultural income is supplemented.        |

100 **Table S3. The definitions of factors influencing the farmers' livelihood resilience.**

| Influencing factors                                | Definition                                                                                                                                                                                    |
|----------------------------------------------------|-----------------------------------------------------------------------------------------------------------------------------------------------------------------------------------------------|
| Non-agricultural level (V <sub>1</sub> )           | Non-agricultural income as a share of annual household income (%)                                                                                                                             |
| Highest education (V <sub>2</sub> )                | The highest education level among family members (1=uneducated, 2=elementary school, 3=junior high school, 4=senior high school, 5=technical secondary school, 6= college graduate or higher) |
| Age of household head (V <sub>3</sub> )            | Age of household head in the family                                                                                                                                                           |
| Family size (V <sub>4</sub> )                      | Total family members                                                                                                                                                                          |
| Arable area (V <sub>5</sub> )                      | Total household arable area (Mu <sup>1</sup> )                                                                                                                                                |
| Agricultural technology training (V <sub>6</sub> ) | Number of times of participating in agricultural technology training per year                                                                                                                 |
| Convenience of transportation (V <sub>7</sub> )    | Does convenient transportation surround your home? (1=very inconvenient, 2=inconvenient, 3=general, 4=convenient, 5=very convenient)                                                          |
| Accessibility of information (V <sub>8</sub> )     | Do you have easy access to the information? (1=difficult, 2=general, 3=easy)                                                                                                                  |
| Change of livelihood strategies (V <sub>9</sub> )  | Number of changing livelihood strategies                                                                                                                                                      |
| Awareness of climate change (V <sub>10</sub> )     | Whether know about climate change (1=not at all, 2=not very well, 3=generally, 4=somewhat, 5=very well)                                                                                       |
| Climate change perception (V <sub>11</sub> )       | Whether worry about climate change (1=not at all, 2=not very well, 3=generally, 4=somewhat, 5=very well)                                                                                      |

<sup>1</sup> 1 Mu = 0.0667 ha.

**Table S4. Experts' insights on the weight of farmers' livelihood resilience dimension.**

| Dimension                  | Weight (priority order) |
|----------------------------|-------------------------|
| Buffer capacity            | 0.3335 (2)              |
| Self-organization capacity | 0.3263 (3)              |
| Learning capacity          | 0.3402 (1)              |
| Consistency Index (CI)     | 0.0002                  |

**Table S5. Sociodemographic characteristics of surveyed farmers with valid data.**

|                                            | N   | Minimum | Maximum | Mean  | Std. Deviation |
|--------------------------------------------|-----|---------|---------|-------|----------------|
| Gender <sup>1</sup>                        | 596 | 0       | 1       | 0.53  | 0.500          |
| Age                                        | 596 | 18      | 82      | 49.44 | 10.193         |
| Marital status <sup>2</sup>                | 596 | 1       | 5       | 2.02  | 0.292          |
| Education level <sup>3</sup>               | 596 | 1       | 5       | 2.07  | 0.750          |
| Household agricultural income <sup>4</sup> | 596 | 1       | 5       | 2.97  | 1.361          |

<sup>1</sup> Male = 1, Female = 0; <sup>2</sup> Single = 1, Married = 2, Divorced = 3, Widowed = 4, Live-in = 5; <sup>3</sup> Primary school or below = 1, Junior high school = 2, High school or technical secondary school = 3, Junior college = 4, University or above = 5; <sup>4</sup> Below 20000 RMB/year = 1, 20000–39999 RMB/year = 2, 40000–59999 RMB/year = 3, 60000–79999 RMB/year = 4, 80000 RMB/year or above = 5.

**Table S6. The classification of farmers' livelihoods and the percentage of responders in the farmers survey.**

| Different livelihood type  | Number of farmer households | Proportion (%) |
|----------------------------|-----------------------------|----------------|
| Sole agriculture           | 201                         | 33.72          |
| Agriculture as a major job | 203                         | 34.06          |
| Agriculture as a side job  | 192                         | 32.22          |

223 **Table S7. The survey results of farmers' livelihood resilience indicators from all**  
224 **farmers.**

| Dimension                      | Indicator                                         | Description                                                                                                                                                                                                                                                                                      | Mean   | Standard Deviation | Weight |
|--------------------------------|---------------------------------------------------|--------------------------------------------------------------------------------------------------------------------------------------------------------------------------------------------------------------------------------------------------------------------------------------------------|--------|--------------------|--------|
| Buffer capacity (B)            | Household laborers (B <sub>1</sub> )              | The number of household laborers $\times$ 1 + The number of household semi-labor $\times$ 0.5                                                                                                                                                                                                    | 2.114  | 0.627              | 0.011  |
|                                | Health and environmental issues (B <sub>2</sub> ) | Use a sanitary toilet (1=yes, 0=no)                                                                                                                                                                                                                                                              | 0.139  | 0.346              | 0.512  |
|                                | Arable area per capita (B <sub>3</sub> )          | The ratio of household arable area to the household total population (Mu)                                                                                                                                                                                                                        | 10.748 | 10.573             | 0.100  |
|                                | Soil capability index (B <sub>4</sub> )           | Soil quality (1=low, 2=medium, 3=high)                                                                                                                                                                                                                                                           | 1.888  | 0.396              | 0.043  |
|                                | Housing quality (B <sub>5</sub> )                 | Housing type $\times$ 0.5 + Housing area class $\times$ 0.5 (Housing type: 1=dilapidated house, 2=earthen house, 3=brick house, 4=apartment; Housing area class: level 1= $<100\text{ m}^2$ , level 2= $100\sim200\text{ m}^2$ , level 3= $201\sim300\text{ m}^2$ , level 4= $>300\text{ m}^2$ ) | 2.194  | 0.301              | 0.028  |
|                                | Savings (B <sub>6</sub> )                         | 1= $<20,000$ (RMB; the official currency of China, 1 RMB $\approx$ 0.16 US Dollar), 2= $20,000\sim40,000$ (RMB), 3= $40,001\sim60,000$ (RMB), 4= $>60,000$ (RMB)                                                                                                                                 | 2.282  | 1.248              | 0.157  |
|                                | Assets (B <sub>7</sub> )                          | Livestock quantity + Production equipment quantity                                                                                                                                                                                                                                               | 19.438 | 22.937             | 0.149  |
| Self-organization capacity (S) | Social network (S <sub>1</sub> )                  | Whether get cooperation from other village people (1=yes, 0=no)                                                                                                                                                                                                                                  | 0.977  | 0.151              | 0.003  |
|                                | Neighborhood trust (S <sub>2</sub> )              | Trust degree of neighbors (1=very low, 2=low, 3=average, 4=high, 5=very high)                                                                                                                                                                                                                    | 4.324  | 0.869              | 0.006  |
|                                | Access to market (S <sub>3</sub> )                | Distance of residence to the nearest agricultural products market (km)                                                                                                                                                                                                                           | 5.788  | 8.017              | 0.072  |
|                                | Leadership (S <sub>4</sub> )                      | Whether there is a civil servant or village cadre in the family members (1=yes, 0=no)                                                                                                                                                                                                            | 0.153  | 0.360              | 0.250  |
|                                | Specialized cooperative (S <sub>5</sub> )         | Whether family members are a member of a cooperative society                                                                                                                                                                                                                                     | 0.211  | 0.408              | 0.207  |



|                          |                                                                                                                                                                              |                                                                                                                       |       |       |       |
|--------------------------|------------------------------------------------------------------------------------------------------------------------------------------------------------------------------|-----------------------------------------------------------------------------------------------------------------------|-------|-------|-------|
| Learning<br>capacity (L) | (1=yes, 0=no)                                                                                                                                                                |                                                                                                                       |       |       |       |
|                          | Grain self-sufficiency (S <sub>6</sub> )                                                                                                                                     | Whether can grain self-sufficiency (1=yes, 0=no)                                                                      | 0.032 | 0.176 | 0.459 |
|                          | Access to credit (S <sub>7</sub> )                                                                                                                                           | Whether can borrow money from a bank or credit union (1=yes, 0=no)                                                    | 0.985 | 0.122 | 0.002 |
|                          | Household head education level (1=uneducated, 2=elementary school, 3=junior high school, 4=senior high school, 5= technical secondary school, 6= college graduate or higher) |                                                                                                                       |       |       |       |
|                          | Education of household head (L <sub>1</sub> )                                                                                                                                |                                                                                                                       | 3.077 | 0.756 | 0.034 |
|                          | Previous work experience (L <sub>2</sub> )                                                                                                                                   | Years of involvement in forestry or agriculture (1=<5 years, 2=6~10 years, 3=11~15 years, 4=16~20 years, 5=>20 years) | 4.151 | 1.203 | 0.050 |
|                          | Information accessing capacity (L <sub>3</sub> )                                                                                                                             | The number of channels that family access to information                                                              | 4.087 | 1.773 | 0.096 |
|                          | Purchase of insurance (L <sub>4</sub> )                                                                                                                                      | Whether buy agriculture or forestry insurance for annual (1=yes, 0=no)                                                | 0.886 | 0.318 | 0.062 |
|                          | Education investment (L <sub>5</sub> )                                                                                                                                       | Education cost per year (1=<2,000 RMB, 2=2,000~4,000 RMB, 3=4,001~6,000 RMB, 4=6,001~8,000 RMB, 5=>8,000 RMB)         | 2.529 | 1.713 | 0.385 |
|                          | Technical training (L <sub>6</sub> )                                                                                                                                         | Whether participate in training organized by the government (1=yes, 0=no)                                             | 0.601 | 0.490 | 0.260 |
|                          | Knowledge transfer capability (L <sub>7</sub> )                                                                                                                              | Whether learn new ideas/practices from other farmers or professionals (1=yes, 0=no)                                   | 0.800 | 0.400 | 0.113 |

225  
226  
227  
228  
229  
230  
231  
232  
233  
234

**Table S8. The livelihood resilience value of farmers with different livelihood types.**

| Different livelihood type        | Dimensions       | Buffer capacity | Self-organization capacity | Learning capacity | Livelihood resilience |
|----------------------------------|------------------|-----------------|----------------------------|-------------------|-----------------------|
|                                  |                  |                 |                            |                   |                       |
| Sole agriculture                 |                  | 0.066           | 0.028                      | 0.170             | 0.264                 |
| Agriculture as a major job       |                  | 0.070           | 0.042                      | 0.193             | 0.306                 |
| Agriculture as a side job        |                  | 0.061           | 0.037                      | 0.193             | 0.290                 |
| Test of homogeneity of variances | Levene statistic | 4.990           | 7.506                      | 1.719             | 0.550                 |
|                                  | Significance     | 0.007***        | 0.001***                   | 0.180             | 0.577                 |
| ANOVA                            | F statistics     | 1.006           | 4.847                      | 5.629             | 5.168                 |
|                                  | Significance     | 0.366           | 0.008***                   | 0.004***          | 0.006***              |

Note: \*\*\* indicates significant at the level of 1%.

263  
264

**Table S9. The scores of livelihood resilience indicators of farmers with different livelihood types.**

| Indicator                                         | Different livelihood type | Sole agriculture |                    | Agriculture as a major job |                    | Agriculture as a side job |                    | Total farmers |                    | ANOVA         |
|---------------------------------------------------|---------------------------|------------------|--------------------|----------------------------|--------------------|---------------------------|--------------------|---------------|--------------------|---------------|
|                                                   |                           | Mean             | Standard deviation | Mean                       | Standard deviation | Mean                      | Standard deviation | Mean          | Standard deviation | F statistics  |
| Household laborers (B <sub>1</sub> )              |                           | 1.985            | 0.598              | 2.148                      | 0.610              | 2.214                     | 0.656              | 2.114         | 0.627              | 7.096**<br>*  |
| Health and environmental issues (B <sub>2</sub> ) |                           | 0.179            | 0.384              | 0.108                      | 0.312              | 0.130                     | 0.337              | 0.139         | 0.347              | 2.210         |
| Arable area per capita (B <sub>3</sub> )          |                           | 10.888           | 8.742              | 12.392                     | 12.544             | 8.862                     | 9.794              | 10.748        | 10.582             | 5.603**<br>*  |
| Soil capability index (B <sub>4</sub> )           |                           | 1.950            | 0.421              | 1.897                      | 0.351              | 1.813                     | 0.404              | 1.888         | 0.396              | 6.113**<br>*  |
| Housing quality (B <sub>5</sub> )                 |                           | 2.157            | 0.307              | 2.214                      | 0.294              | 2.211                     | 0.300              | 2.194         | 0.301              | 2.319*        |
| Savings (B <sub>6</sub> )                         |                           | 1.945            | 1.192              | 2.685                      | 1.262              | 2.208                     | 1.179              | 2.282         | 1.249              | 19.301*<br>** |
| Assets (B <sub>7</sub> )                          |                           | 16.662           | 23.561             | 25.887                     | 23.385             | 15.526                    | 20.356             | 19.438        | 22.957             | 12.751*<br>** |
| Social network (S <sub>1</sub> )                  |                           | 0.975            | 0.156              | 0.956                      | 0.206              | 1.000                     | 0.000              | 0.977         | 0.152              | 4.280**       |
| Neighborhood trust (S <sub>2</sub> )              |                           | 4.328            | 0.708              | 4.384                      | 0.944              | 4.255                     | 0.939              | 4.324         | 0.870              | 1.089         |
| Access to market (S <sub>3</sub> )                |                           | 6.436            | 8.712              | 4.610                      | 7.990              | 3.536                     | 2.745              | 4.880         | 7.144              | 8.525**<br>*  |
| Leadership (S <sub>4</sub> )                      |                           | 0.080            | 0.271              | 0.177                      | 0.383              | 0.203                     | 0.403              | 0.153         | 0.360              | 6.626**<br>*  |
| Specialized cooperative (S <sub>5</sub> )         |                           | 0.149            | 0.357              | 0.241                      | 0.429              | 0.245                     | 0.431              | 0.211         | 0.409              | 3.542**       |
| Grain self-sufficiency (S <sub>6</sub> )          |                           | 0.045            | 0.207              | 0.049                      | 0.217              | 0.000                     | 0.000              | 0.032         | 0.176              | 4.748**<br>*  |
| Access to credit (S <sub>7</sub> )                |                           | 0.985            | 0.122              | 0.985                      | 0.121              | 0.984                     | 0.124              | 0.985         | 0.122              | 0.003         |
| Education of household head (L <sub>1</sub> )     |                           | 2.905            | 0.711              | 3.089                      | 0.739              | 3.245                     | 0.784              | 3.077         | 0.756              | 10.223*<br>** |

|                                                        |       |       |       |       |       |       |       |       |               |
|--------------------------------------------------------|-------|-------|-------|-------|-------|-------|-------|-------|---------------|
| Previous work<br>experience (L <sub>2</sub> )          | 4.274 | 1.127 | 4.286 | 1.070 | 3.880 | 1.366 | 4.151 | 1.204 | 7.323**<br>*  |
| Information<br>accessing<br>capacity (L <sub>3</sub> ) | 4.075 | 1.664 | 4.202 | 1.881 | 3.979 | 1.772 | 4.087 | 1.774 | 0.785         |
| Purchase of<br>insurance (L <sub>4</sub> )             | 0.791 | 0.408 | 0.926 | 0.262 | 0.943 | 0.233 | 0.886 | 0.318 | 14.217*<br>** |
| Education<br>investment (L <sub>5</sub> )              | 2.408 | 1.718 | 2.576 | 1.700 | 2.604 | 1.727 | 2.529 | 1.714 | 0.762         |
| Technical<br>training (L <sub>6</sub> )                | 0.507 | 0.501 | 0.655 | 0.476 | 0.641 | 0.481 | 0.601 | 0.490 | 5.612**<br>*  |
| Knowledge<br>transfer<br>capability (L <sub>7</sub> )  | 0.766 | 0.424 | 0.798 | 0.402 | 0.839 | 0.369 | 0.800 | 0.400 | 1.615         |

Note: \*\*\*, \*\*, \* indicate significant at the level of 1%, 5%, and 10%, respectively.

**Table S10. The livelihood resilience of farmers in different towns.**

| Different town                   | Dimensions       | Buffer capacity | Self-organization capacity | Learning capacity | Livelihood resilience |
|----------------------------------|------------------|-----------------|----------------------------|-------------------|-----------------------|
| Saliba                           |                  | 0.053           | 0.022                      | 0.184             | 0.259                 |
| Sijiazi                          |                  | 0.076           | 0.043                      | 0.231             | 0.350                 |
| Xiawa                            |                  | 0.054           | 0.043                      | 0.159             | 0.256                 |
| Changsheng                       |                  | 0.046           | 0.012                      | 0.138             | 0.195                 |
| Fengshou                         |                  | 0.086           | 0.049                      | 0.189             | 0.323                 |
| Test of homogeneity of variances | Levene statistic | 53.052          | 31.110                     | 9.037             | 8.919                 |
|                                  | Significance     | 0.000***        | 0.000***                   | 0.000***          | 0.000***              |
| ANOVA                            | F statistics     | 8.861           | 12.637                     | 24.174            | 26.700                |
|                                  | Significance     | 0.000***        | 0.000***                   | 0.000***          | 0.000***              |

Note: \*\*\* indicates significant at the level of 1%.

**Table S11. The scores of livelihood resilience indicators of farmers in different towns.**

| Indicator \ Different Town                        | Saliba |                    | Sijiazi |                    | Xiawa  |                    | Changsheng |                    | Fengshou |                    | Total farmers |                    | ANOVA        |
|---------------------------------------------------|--------|--------------------|---------|--------------------|--------|--------------------|------------|--------------------|----------|--------------------|---------------|--------------------|--------------|
|                                                   | Mean   | Standard Deviation | Mean    | Standard Deviation | Mean   | Standard Deviation | Mean       | Standard Deviation | Mean     | Standard Deviation | Mean          | Standard Deviation | F statistics |
| Household laborers (B <sub>1</sub> )              | 1.946  | 0.604              | 2.118   | 0.548              | 2.228  | 0.671              | 2.038      | 0.335              | 2.205    | 0.765              | 2.114         | 0.627              | 4.217***     |
| Health and environmental issues (B <sub>2</sub> ) | 0.092  | 0.290              | 0.143   | 0.351              | 0.036  | 0.186              | 0.000      | 0.000              | 0.333    | 0.473              | 0.139         | 0.347              | 19.819***    |
| Arable area per capita (B <sub>3</sub> )          | 8.120  | 5.441              | 10.549  | 12.167             | 11.060 | 9.082              | 24.469     | 10.571             | 5.264    | 5.489              | 10.748        | 10.582             | 64.452***    |
| Soil capability index (B <sub>4</sub> )           | 1.942  | 0.395              | 1.721   | 0.450              | 1.723  | 0.449              | 2.000      | 0.000              | 2.069    | 0.281              | 1.888         | 0.396              | 23.903***    |
| Housing quality (B <sub>5</sub> )                 | 1.975  | 0.193              | 2.154   | 0.274              | 2.228  | 0.299              | 2.319      | 0.242              | 2.319    | 0.322              | 2.194         | 0.301              | 32.132***    |
| Savings (B <sub>6</sub> )                         | 2.108  | 1.262              | 2.771   | 1.266              | 2.661  | 1.227              | 2.200      | 0.960              | 1.701    | 1.104              | 2.282         | 1.249              | 18.291***    |
| Assets (B <sub>7</sub> )                          | 19.342 | 31.354             | 30.986  | 21.880             | 20.580 | 20.921             | 15.688     | 9.158              | 9.486    | 16.855             | 19.438        | 22.957             | 18.089***    |
| Social network (S <sub>1</sub> )                  | 0.892  | 0.312              | 1.000   | 0.000              | 1.000  | 0.000              | 1.000      | 0.000              | 0.993    | 0.083              | 0.977         | 0.152              | 12.755***    |
| Neighborhood trust (S <sub>2</sub> )              | 4.425  | 0.876              | 4.136   | 1.236              | 4.063  | 0.634              | 5.000      | 0.000              | 4.250    | 0.597              | 4.324         | 0.870              | 18.942***    |
| Access to market (S <sub>3</sub> )                | 4.614  | 2.975              | 4.067   | 3.496              | 3.178  | 2.170              | 5.656      | 5.198              | 6.784    | 12.944             | 4.880         | 7.144              | 5.010***     |
| Leadership (S <sub>4</sub> )                      | 0.075  | 0.264              | 0.171   | 0.378              | 0.071  | 0.259              | 0.050      | 0.219              | 0.319    | 0.468              | 0.153         | 0.360              | 13.285***    |
| Specialized cooperative (S <sub>5</sub> )         | 0.008  | 0.091              | 0.364   | 0.483              | 0.313  | 0.466              | 0.038      | 0.191              | 0.250    | 0.435              | 0.211         | 0.409              | 20.293***    |
| Grain self-sufficiency                            | 0.075  | 0.264              | 0.000   | 0.000              | 0.080  | 0.273              | 0.000      | 0.000              | 0.007    | 0.083              | 0.032         | 0.176              | 6.713***     |

|                                                  |       |       |       |       |       |       |       |       |       |       |       |       |           |  |
|--------------------------------------------------|-------|-------|-------|-------|-------|-------|-------|-------|-------|-------|-------|-------|-----------|--|
| (S <sub>6</sub> )                                |       |       |       |       |       |       |       |       |       |       |       |       |           |  |
| Access to credit (S <sub>7</sub> )               | 0.992 | 0.091 | 0.979 | 0.145 | 1.000 | 0.000 | 0.988 | 0.112 | 0.972 | 0.165 | 0.985 | 0.122 | 1.012     |  |
| Education of household head (L <sub>1</sub> )    | 2.783 | 0.624 | 3.393 | 0.736 | 3.063 | 0.751 | 2.825 | 0.742 | 3.167 | 0.757 | 3.077 | 0.756 | 14.580*** |  |
| Previous work experience (L <sub>2</sub> )       | 4.250 | 1.218 | 4.207 | 1.083 | 4.259 | 1.153 | 4.163 | 1.195 | 3.924 | 1.328 | 4.151 | 1.204 | 1.800     |  |
| Information accessing capacity (L <sub>3</sub> ) | 5.108 | 1.549 | 3.536 | 2.100 | 3.625 | 1.202 | 4.200 | 0.753 | 4.069 | 2.009 | 4.087 | 1.774 | 16.939*** |  |
| Purchase of insurance (L <sub>4</sub> )          | 0.825 | 0.382 | 1.000 | 0.000 | 0.732 | 0.445 | 0.988 | 0.112 | 0.889 | 0.315 | 0.886 | 0.318 | 15.569*** |  |
| Education investment (L <sub>5</sub> )           | 2.042 | 1.606 | 2.707 | 1.856 | 2.777 | 1.702 | 1.763 | 1.082 | 2.993 | 1.736 | 2.529 | 1.714 | 10.676*** |  |
| Technical training (L <sub>6</sub> )             | 0.667 | 0.473 | 0.957 | 0.203 | 0.375 | 0.486 | 0.438 | 0.499 | 0.465 | 0.501 | 0.601 | 0.490 | 37.252*** |  |
| Knowledge transfer capability (L <sub>7</sub> )  | 0.942 | 0.235 | 0.986 | 0.119 | 0.563 | 0.498 | 0.538 | 0.502 | 0.833 | 0.374 | 0.800 | 0.400 | 37.372*** |  |

Note: \*\*\* indicates significant at the level of 1%.

**Table S12. Factors influencing farmers' livelihood resilience to climate change and survey results from all farmers.**

| Influencing factors                                | Definition                                                                                                                                                                                     | Mean   | Standard Deviation |
|----------------------------------------------------|------------------------------------------------------------------------------------------------------------------------------------------------------------------------------------------------|--------|--------------------|
| Non-agricultural level (V <sub>1</sub> )           | Non-agricultural income as a share of annual household income (%)                                                                                                                              | 0.427  | 0.374              |
| Highest education (V <sub>2</sub> )                | The highest education level among family members (1=uneducated, 2=elementary school, 3=junior high school, 4=senior high school, 5= technical secondary school, 6= college graduate or higher) | 3.711  | 1.183              |
| Age of household head (V <sub>3</sub> )            | Age of household head in the family                                                                                                                                                            | 49.441 | 10.193             |
| Family size (V <sub>4</sub> )                      | Total family members                                                                                                                                                                           | 2.982  | 1.031              |
| Arable area (V <sub>5</sub> )                      | Total household arable area (Mu)                                                                                                                                                               | 30.047 | 29.981             |
| Agricultural technology training (V <sub>6</sub> ) | Number of times of participating in agricultural technology training per year                                                                                                                  | 1.696  | 1.438              |
| Convenience of transportation (V <sub>7</sub> )    | Does convenient transportation surround your home? (1=very inconvenient, 2=inconvenient, 3=general, 4=convenient, 5=very convenient)                                                           | 3.693  | 1.385              |
| Accessibility of information (V <sub>8</sub> )     | Do you have easy access to the information? (1=difficult, 2=general, 3=easy)                                                                                                                   | 1.923  | 0.523              |
| Change of livelihood strategies (V <sub>9</sub> )  | Number of changing livelihood strategies                                                                                                                                                       | 1.082  | 1.285              |
| Awareness of climate change (V <sub>10</sub> )     | Whether know about climate change (1=not at all, 2=not very well, 3=generally, 4=somewhat, 5=very well)                                                                                        | 3.128  | 0.898              |
| Climate change perception (V <sub>11</sub> )       | Whether worry about climate change (1=not at all, 2=not very well, 3=generally, 4=somewhat, 5=very well)                                                                                       | 2.691  | 1.046              |



340 **Table S13. Regression analysis results of factors influencing the livelihood resilience of**  
341 **farmers with different livelihood types.**

| Influencing factors                   | Coefficients in regression analysis results by livelihood type |                            |                           |             | Variance inflation factor |
|---------------------------------------|----------------------------------------------------------------|----------------------------|---------------------------|-------------|---------------------------|
|                                       | Sole agriculture                                               | Agriculture as a major job | Agriculture as a side job | All farmers |                           |
| Non-agricultural level (V1)           | 0.267***                                                       | -0.301***                  | 0.072                     | 0.052       | 1.074                     |
| Highest education (V2)                | 0.431***                                                       | 0.353***                   | 0.404***                  | 0.398***    | 1.383                     |
| Age of household head (V3)            | -0.227***                                                      | -0.278***                  | -0.050                    | -0.204***   | 1.259                     |
| Family size (V4)                      | 0.398***                                                       | 0.516***                   | 0.407***                  | 0.456***    | 1.589                     |
| Arable area (V5)                      | 0.218***                                                       | 0.048                      | -0.091                    | 0.061*      | 1.078                     |
| Agricultural technology training (V6) | 0.521***                                                       | 0.454***                   | 0.495***                  | 0.496***    | 1.258                     |
| Convenience of transportation (V7)    | 0.237***                                                       | 0.015                      | 0.090                     | 0.132***    | 1.071                     |
| Accessibility of information (V8)     | 0.017                                                          | 0.152**                    | 0.098*                    | 0.091**     | 1.144                     |
| Change of livelihood strategies (V9)  | 0.065                                                          | 0.123**                    | 0.154**                   | 0.117***    | 1.191                     |
| Awareness of climate change (V10)     | 0.483***                                                       | 0.320***                   | 0.268***                  | 0.362***    | 1.333                     |
| Climate change perception (V11)       | 0.252***                                                       | 0.140**                    | 0.063                     | 0.147***    | 1.369                     |
| Constant                              | -1.336                                                         | 1.307                      | -2.348**                  | -1.892*     |                           |
| Number of                             | 201                                                            | 203                        | 192                       | 596         |                           |

|              |           |           |           |           |
|--------------|-----------|-----------|-----------|-----------|
| samples      |           |           |           |           |
| Adjust R2    | 0.524     | 0.538     | 0.458     | 0.483     |
| F statistics | 20.985*** | 22.379*** | 15.670*** | 51.501*** |

---

Note: \*\*\*, \*\*, \* indicate significance at the 1%, 5%, and 10% levels, respectively.

342  
343  
344  
345  
346  
347  
348  
349  
350  
351  
352  
353  
354  
355  
356  
357  
358  
359  
360  
361  
362  
363  
364  
365  
366  
367  
368  
369  
370  
371  
372  
373

374 **Table S14. Regression analysis results of factors influencing the livelihood resilience of**  
375 **farmers in different towns.**

| Influencing factors                   | Coefficients in regression analysis results by town |           |           |            |          |             | Variance inflation factor |
|---------------------------------------|-----------------------------------------------------|-----------|-----------|------------|----------|-------------|---------------------------|
|                                       | Saliba                                              | Sijiazi   | Xiawa     | Changsheng | Fengshou | All farmers |                           |
| Non-agricultural level (V1)           | 0.087                                               | 0.082     | -0.097    | -0.085     | -0.122*  | 0.052       | 1.074                     |
| Highest education (V2)                | 0.143*                                              | 0.379***  | 0.493***  | 0.574***   | 0.345*** | 0.398***    | 1.383                     |
| Age of household head (V3)            | -0.259***                                           | -0.316*** | -0.289*** | -0.502***  | -0.044   | -0.204***   | 1.259                     |
| Family size (V4)                      | 0.381***                                            | 0.502***  | 0.503***  | 0.760***   | 0.335*** | 0.456***    | 1.589                     |
| Arable area (V5)                      | 0.200**                                             | 0.081     | 0.164**   | 0.600***   | 0.362*** | 0.061*      | 1.078                     |
| Agricultural technology training (V6) | 0.536***                                            | 0.060     | 0.614***  | 0.843***   | 0.504*** | 0.496***    | 1.258                     |
| Convenience of transportation (V7)    | 0.191**                                             | -0.039    | -0.076    | -0.105     | 0.297*** | 0.132***    | 1.071                     |
| Accessibility of information (V8)     | -0.332***                                           | 0.227***  | 0.192**   | 0.000***   | 0.342*** | 0.091**     | 1.144                     |
| Change of livelihood strategies (V9)  | 0.331***                                            | 0.233***  | -0.038    | 0.634***   | -0.005   | 0.117***    | 1.191                     |
| Awareness of climate change (V10)     | 0.108                                               | 0.092     | 0.346***  | 0.588***   | 0.449*** | 0.362***    | 1.333                     |
| Climate change perception             | 0.380***                                            | 0.027     | 0.253***  | 0.325***   | 0.142**  | 0.147***    | 1.369                     |

(V11)

|                   |          |          |           |           |           |           |
|-------------------|----------|----------|-----------|-----------|-----------|-----------|
| Constant          | 0.987    | -0.055   | 2.131**   | -1.039    | -2.348**  | -1.892*   |
| Number of samples | 120      | 140      | 112       | 80        | 144       | 596       |
| Adjust R2         | 0.441    | 0.345    | 0.639     | 0.885     | 0.458     | 0.483     |
| F statistics      | 9.522*** | 7.642*** | 18.843*** | 61.990*** | 15.670*** | 51.501*** |

Note: \*\*\*, \*\*, \* indicate significance at the 1%, 5%, and 10% levels, respectively.
